# Supplementary figures and images for: Nonindependent Domestication of the Two Rice Subspecies,Oryza sativassp.indicaand ssp.japonica, Demonstrated by Multilocus Microsatellites
Source: Oxford University Press journal article supplement (doi:10.1534/genetics.106.068072), 2008-05-28

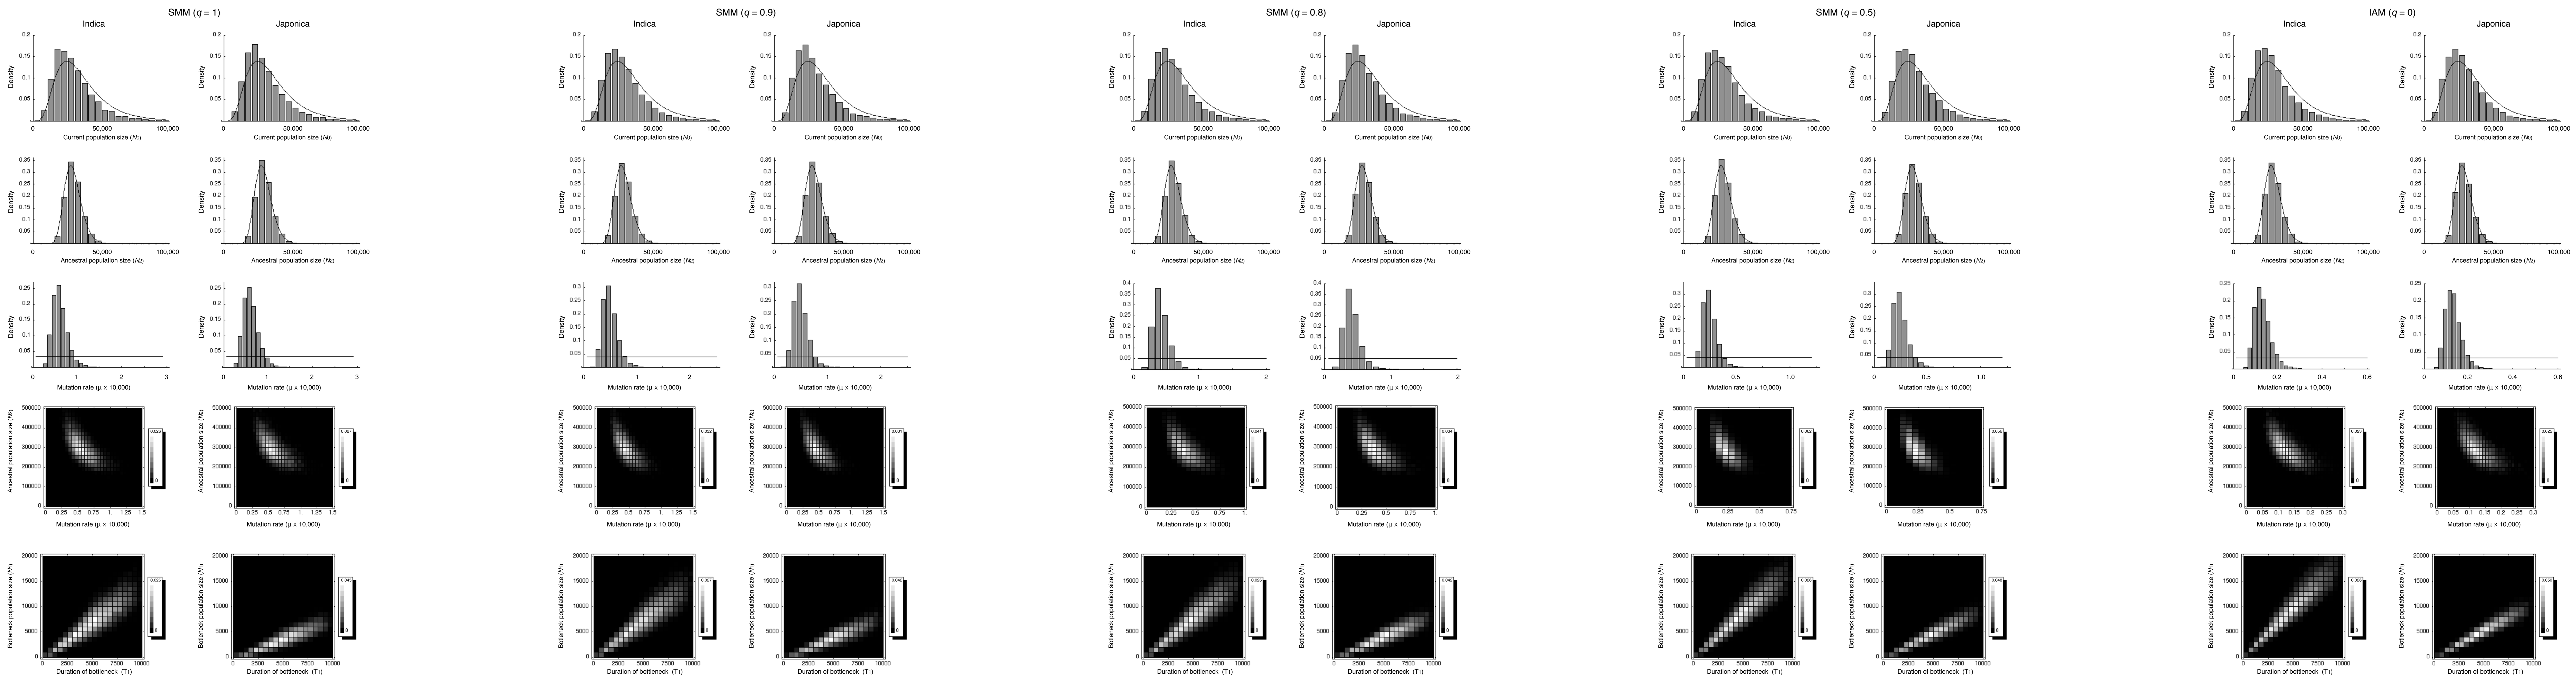

Supplement: genetics.106.068072-1.pdf [file genetics.106.068072-1.pdf]

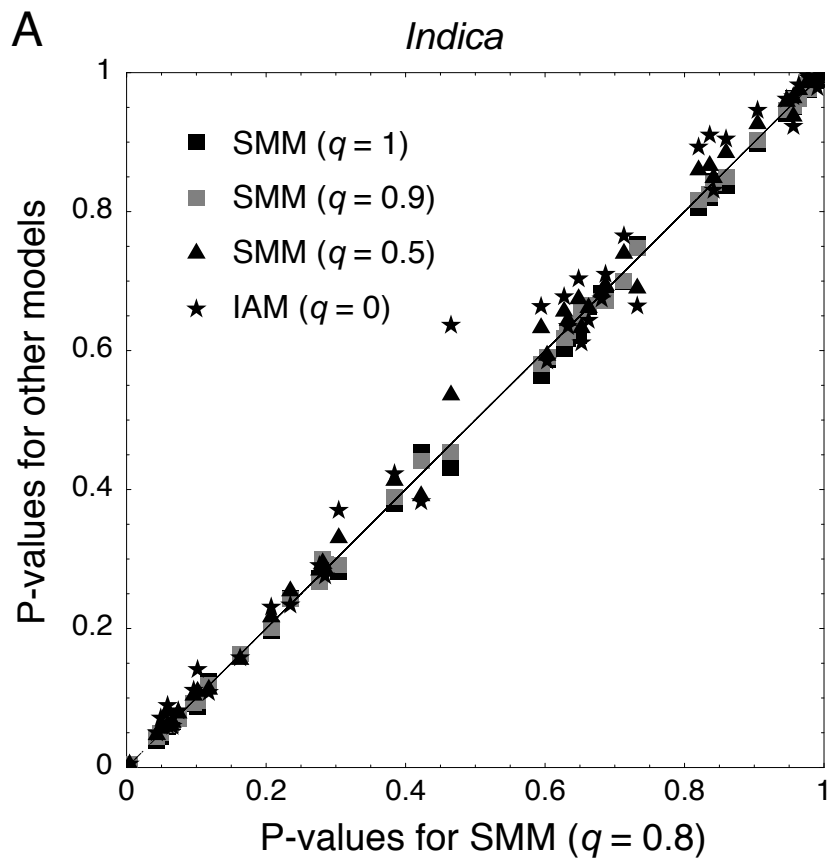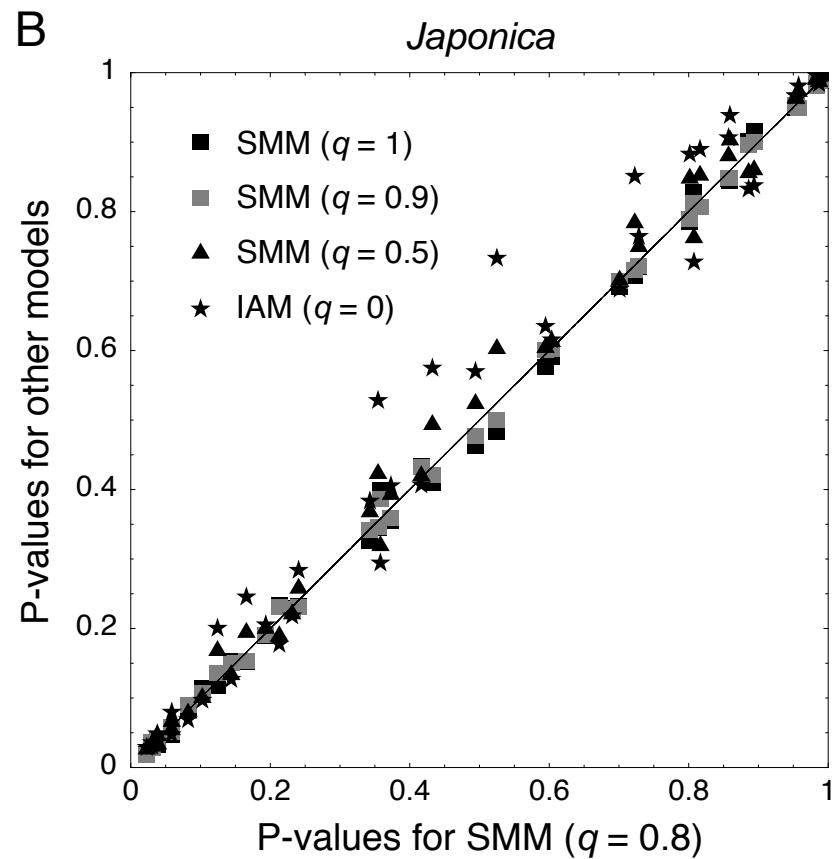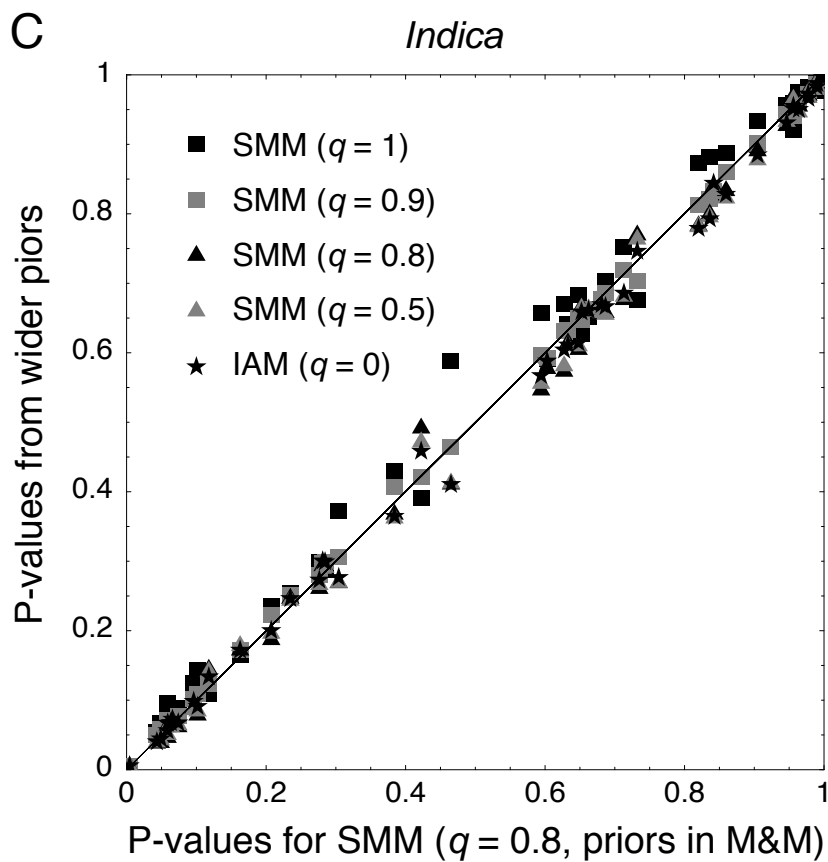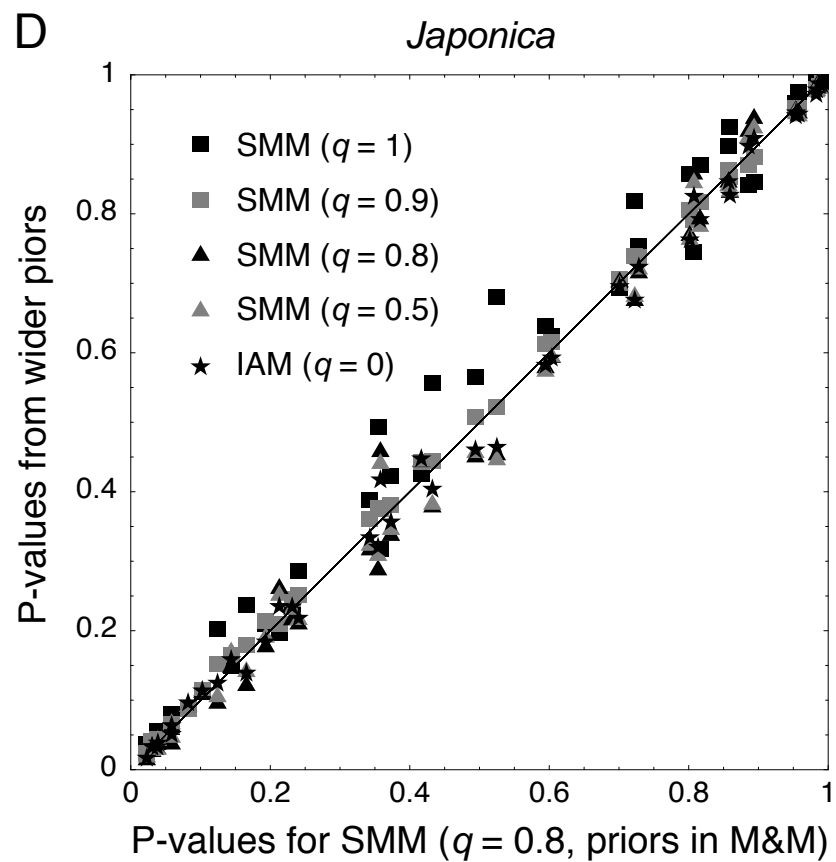

Supplement: genetics.106.068072-2.pdf [file genetics.106.068072-2.pdf]
